# Supplementary material
Source: HighWire-hosted journal article supplement (https://ard.bmj.com/content/82/3/365)

Non-SSc Controls

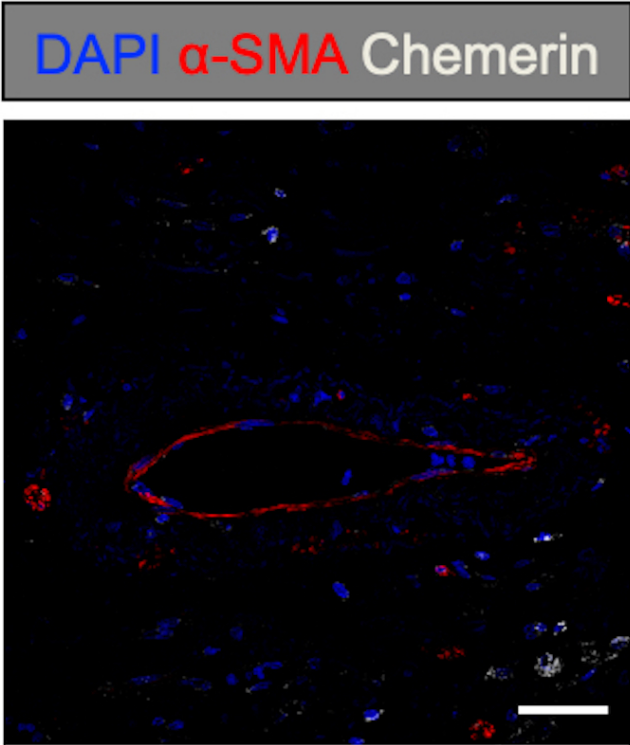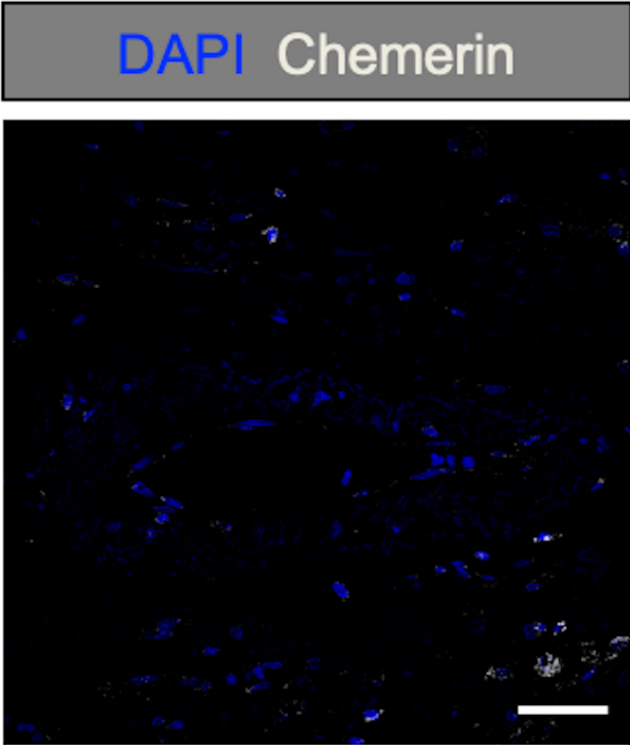

SSc-no PAH

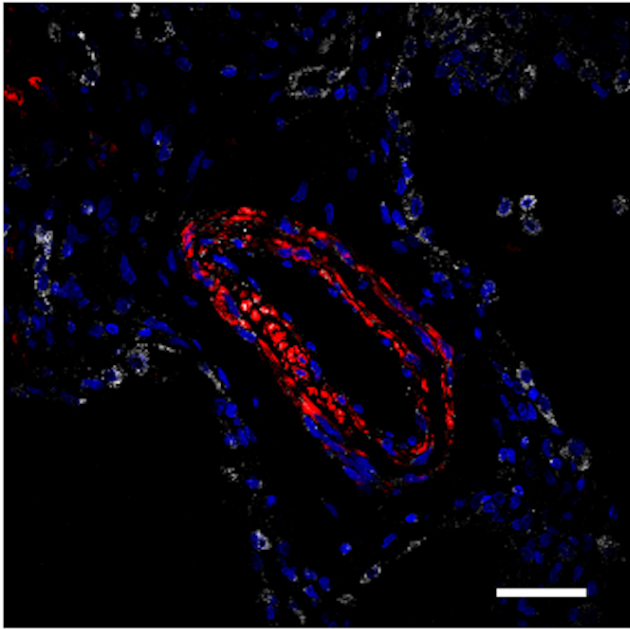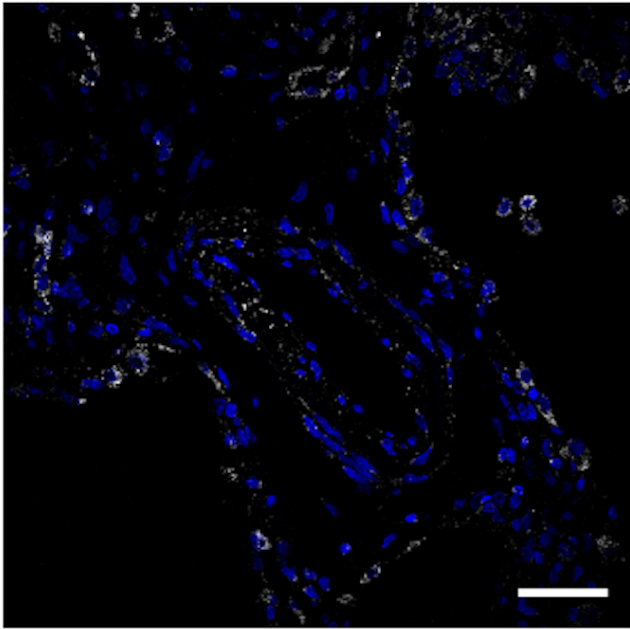

SSc-PAH

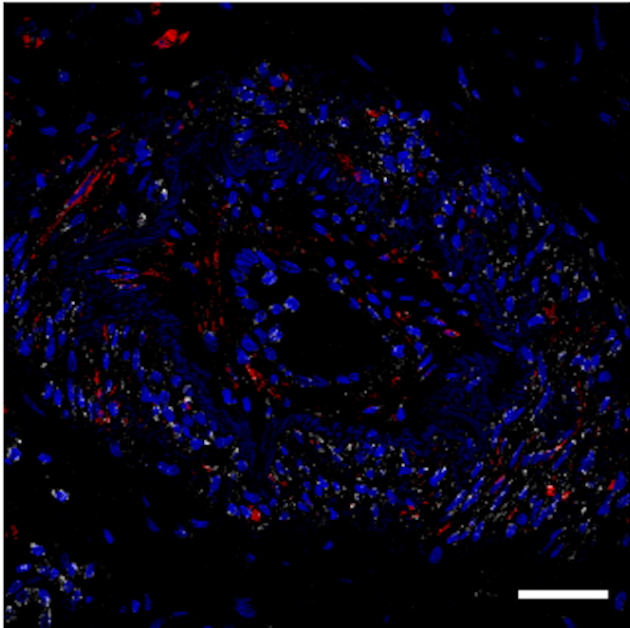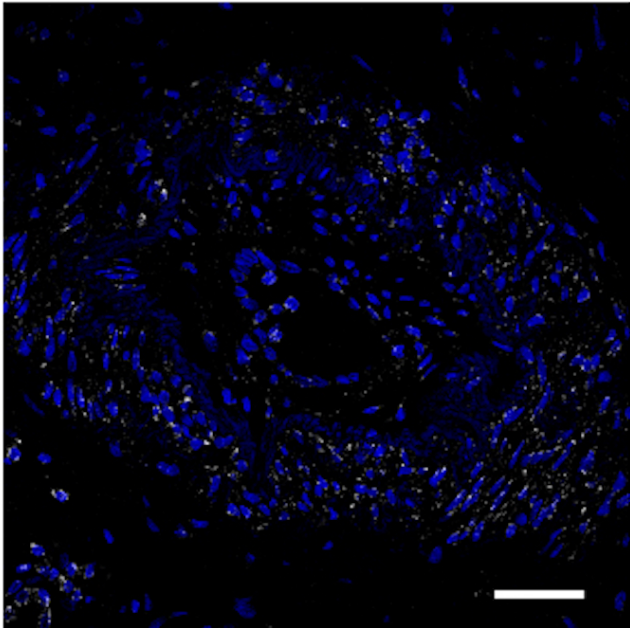

Supplement: inline-supplementary-material-2 [file inline-supplementary-material-2.pdf]
